# Supplementary material for: H2O2 mediates the regulation of ABA catabolism and GA biosynthesis in Arabidopsis seed dormancy and germination
Source: PubMed Central journal article supplement — J Exp Bot. 2010 May 11;61(11):2979–90. doi: 10.1093/jxb/erq125 (PMC2892143; doi:10.1093/jxb/erq125), 2010-05-11
Supplement: erq125_1.pdf [file erq125_1.pdf]

**H<sub>2</sub>O<sub>2</sub> mediates the regulations of ABA catabolism and GA biosynthesis in Arabidopsis seed dormancy and germination**

*Yinggao Liu, Nenghui Ye, Rui Liu, Moxian Chen, and Jianhua Zhang*

**Supplementary Material**

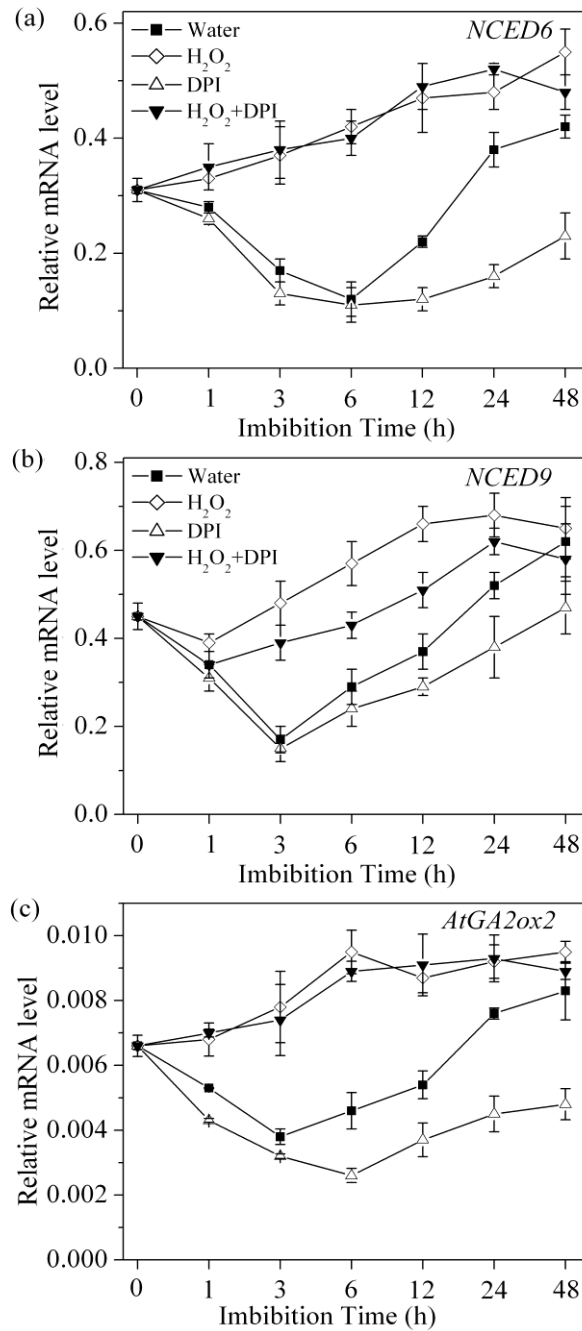

Supplementary Figure 1. Effects of H<sub>2</sub>O<sub>2</sub> on the expressions of ABA biosynthesis and GA catabolism genes during imbibition. The genes were analyzed by QRT-PCR. H<sub>2</sub>O<sub>2</sub> at 10 mM and DPI at 10 μM were used to manipulate H<sub>2</sub>O<sub>2</sub> levels for these experiments. Values are means with SE (n=4 for A and n=3 for B and C).

- A. Changes in the transcript levels of *NCED6* at first 48 h during imbibition.
- B. Changes in the transcript levels of *NCED9* at first 48 h during imbibition.
- C. Changes in the transcript levels of *GA2ox2* at first 48 h during imbibition.
